# Supplementary material
Source: PubMed Central journal article supplement (PMC8430909)
Supplement: jamaophthalmol-e213544-s002.pdf [file jamaophthalmol-e213544-s002.pdf]

## Supplementary Online Content

Neitzel AJ, Wolf B, Guo X, et al. Effect of a randomized interventional school-based vision program on academic performance of students in grades 3 to 7: a cluster randomized clinical trial. *JAMA Ophthalmol*. Published online September 9, 2021.

doi:10.1001/jamaophthalmol.2021.3544

**eTable 1.** Baseline School-Level Characteristics by Study Cohort

**eTable 2.** School Attrition Rate by Outcome Measure Period

**eTable 3.** Student Retention Rate by Outcome Measure Period and Cohort

**eTable 4.** Baseline Student-Level Characteristics by Study Cohort

**eTable 5.** Baseline Academic Test Outcome Equivalence

**eFigure.** Comparison of Effect Size for V4B i-Ready Reading at 1 Year vs Common Educational Interventions

This supplementary material has been provided by the authors to give readers additional information about their work.

**eTable 1.** Baseline School-Level Characteristics by Study Cohort

|                      | <b>Cohort 1</b> | <b>Cohort 2</b> | <b>Cohort 3</b> |
|----------------------|-----------------|-----------------|-----------------|
| Number of Schools    | 41              | 41              | 38              |
| Charter, N (%)       | 8 (19.5)        | 8 (19.5)        | 7 (18.4)        |
| Pilot schools, N (%) | 3 (7.3)         | 2 (4.9)         | 2 (5.3)         |
| School Type, N (%)   |                 |                 |                 |
| Elementary           | 15 (36.6)       | 16 (39.0)       | 14 (36.8)       |
| Elementary/Middle    | 23 (56.1)       | 22 (53.7)       | 22 (57.9)       |
| Middle               | 3 (7.3)         | 3 (7.3)         | 2 (5.3)         |
| Black, mean % (SD)   | 84.0 (19.7)     | 81.9 (26.5)     | 83.9 (23.8)     |
| White, mean % (SD)   | 8.1 (13.3)      | 9.7 (17.2)      | 9.0 (15.7)      |
| Latinx, mean % (SD)  | 5.3 (9.0)       | 6.2 (14.8)      | 5.0 (10.5)      |
| Asian, mean % (SD)   | 1.3 (3.1)       | 1.0 (1.4)       | 0.8 (1.7)       |
| Male, mean % (SD)    | 53.0 (11.2)     | 50.7 (3.1)      | 49.3 (8.8)      |
| ELL, mean % (SD)     | 5.3 (8.9)       | 4.3 (12.6)      | 3.3 (8.8)       |
| SPED, mean % (SD)    | 14.2 (4.2)      | 14.6 (4.8)      | 13.6 (5.0)      |
| FARM, mean % (SD)    | 89.4 (10.1)     | 88.9 (13.9)     | 87.1 (13.8)     |

FARM = free and reduced meals program; ELL = English Language Learner; SD = standard deviation;  
 SPED = special education

**eTable 2.** School Attrition Rate by Outcome Measure Period

| Outcome Period                    | Subject     | Test      | Intervention Group |          |          | Control Group |          |          | Overall Cluster Attrition Rate, % | Differential Cluster Attrition Rate, % |
|-----------------------------------|-------------|-----------|--------------------|----------|----------|---------------|----------|----------|-----------------------------------|----------------------------------------|
|                                   |             |           | Randomized         | Attrited | Analyzed | Randomized    | Attrited | Analyzed |                                   |                                        |
| <b>1-year Intervention Impact</b> |             |           |                    |          |          |               |          |          |                                   |                                        |
| SY 2016-17                        | Reading     | i-Reading | 42                 | 8        | 34       | 85            | 12       | 73       | 15.7                              | 4.9                                    |
|                                   |             | PARCC     | 42                 | 1        | 41       | 85            | 8        | 77       | 7.1                               | 7                                      |
|                                   | Mathematics | i-Reading | 42                 | 8        | 34       | 85            | 13       | 72       | 16.5                              | 3.8                                    |
|                                   |             | PARCC     | 42                 | 1        | 41       | 85            | 7        | 78       | 6.3                               | 5.9                                    |
| SY 2017-18                        | Reading     | i-Reading | 42                 | 9        | 33       | 43            | 11       | 32       | 23.5                              | 4.2                                    |
|                                   |             | PARCC     | 42                 | 1        | 41       | 43            | 6        | 37       | 8.2                               | 11.6                                   |
|                                   | Mathematics | i-Reading | 42                 | 9        | 33       | 43            | 10       | 33       | 22.4                              | 1.8                                    |
|                                   |             | PARCC     | 42                 | 1        | 41       | 43            | 5        | 38       | 7.1                               | 9.2                                    |
| <b>2-year Intervention Impact</b> |             |           |                    |          |          |               |          |          |                                   |                                        |
| SY 2017-18                        | Reading     | i-Reading | 42                 | 7        | 35       | 43            | 11       | 32       | 21.2                              | 8.9                                    |
|                                   |             | PARCC     | 42                 | 1        | 41       | 43            | 6        | 37       | 8.2                               | 11.6                                   |
|                                   | Mathematics | i-Reading | 42                 | 6        | 36       | 43            | 10       | 33       | 18.8                              | 9                                      |
|                                   |             | PARCC     | 42                 | 1        | 41       | 43            | 5        | 38       | 7.1                               | 9.2                                    |

SY = school year; PARCC = Partnership for Assessment of Readiness for College and Careers.

**eTable 3.** Student Retention Rate by Outcome Measure Period and Cohort

| Outcome Period                    | Subject        | Test    | Cohort 1<br>(N=964) |                    | Cohort 2<br>(N=775) |                    | Cohort 3<br>(N=565) |                    |
|-----------------------------------|----------------|---------|---------------------|--------------------|---------------------|--------------------|---------------------|--------------------|
|                                   |                |         | Analyzed            | Retention Rate (%) | Analyzed            | Retention Rate (%) | Analyzed            | Retention Rate (%) |
| <b>1-year Intervention Impact</b> |                |         |                     |                    |                     |                    |                     |                    |
| <b>SY 2016-17</b>                 | Total analyzed |         | 798                 | 82.8               | 591                 | 76.3               | 428                 | 75.8               |
|                                   | Reading        | i-Ready | 695                 | 72.1               | 465                 | 60.0               | 359                 | 63.5               |
|                                   |                | PARCC   | 781                 | 81.0               | 576                 | 74.3               | 416                 | 73.6               |
|                                   | Mathematics    | i-Ready | 689                 | 71.5               | 462                 | 59.6               | 365                 | 64.6               |
|                                   |                | PARCC   | 788                 | 81.7               | 583                 | 75.2               | 421                 | 74.5               |
| <b>SY 2017-18</b>                 | Total analyzed |         | n/a                 | n/a                | 761                 | 98.2               | 559                 | 98.9               |
|                                   | Reading        | i-Ready | n/a                 | n/a                | 422                 | 54.5               | 332                 | 58.8               |
|                                   |                | PARCC   | n/a                 | n/a                | 591                 | 76.3               | 425                 | 75.2               |
|                                   | Mathematics    | i-Ready | n/a                 | n/a                | 579                 | 74.7               | 460                 | 81.4               |
|                                   |                | PARCC   | n/a                 | n/a                | 750                 | 96.8               | 555                 | 98.2               |
| <b>2-year Intervention Impact</b> |                |         |                     |                    |                     |                    |                     |                    |
| <b>SY 2017-18</b>                 | Total analyzed |         | 876                 | 90.9               | n/a                 | n/a                | 559                 | 98.9               |
|                                   | Reading        | i-Ready | 584                 | 60.6               | n/a                 | n/a                | 332                 | 58.8               |
|                                   |                | PARCC   | 709                 | 73.5               | n/a                 | n/a                | 425                 | 75.2               |
|                                   | Mathematics    | i-Ready | 737                 | 76.5               | n/a                 | n/a                | 460                 | 81.4               |
|                                   |                | PARCC   | 862                 | 89.4               | n/a                 | n/a                | 555                 | 98.2               |

SY = school year; PARCC = Partnership for Assessment of Readiness for College and Careers; n/a = not applicable

Cohort-specific student retention rates calculated as number of students included in a specific testing outcome analysis in a cohort divided by number of students included in any outcome analysis in same cohort.

**eTable 4.** Baseline Student-Level Characteristics by Study Cohort

|                            | <b>Cohort 1</b> | <b>Cohort 2</b> | <b>Cohort 3</b> |
|----------------------------|-----------------|-----------------|-----------------|
| Students (N)               | 964             | 775             | 565             |
| Age (years), mean $\pm$ SD | 9.5 (1.4)       | 9.4 (1.4)       | 9.3 (1.5)       |
| Black                      | 752 (78.0)      | 588 (75.9)      | 449 (79.5)      |
| White                      | 163 (16.9)      | 164 (21.2)      | 105 (18.6)      |
| Latinx                     | 154 (16.0)      | 137 (17.7)      | 97 (17.2)       |
| Asian                      | 20 (2.1)        | 8 (1.0)         | 2 (0.4)         |
| Female                     | 501 (52.0)      | 436 (56.3)      | 323 (57.2)      |
| ELL                        | 84 (8.7)        | 64 (8.3)        | 56 (9.9)        |
| SPED                       | 173 (17.9)      | 130 (16.8)      | 103 (18.2)      |
| Eye Examination Findings   |                 |                 |                 |
| Wearing Rx at baseline     | 38 (3.9)        | 2 (0.3)         | 42 (7.4)        |
| Refractive Error           |                 |                 |                 |
| Emmetropia                 | 249 (25.8)      | 217 (28.0)      | 102 (18.1)      |
| Hyperopia                  | 140 (14.5)      | 100 (12.9)      | 61 (10.8)       |
| Myopia                     | 575 (59.6)      | 458 (59.1)      | 402 (71.2)      |
| Astigmatism                | 408 (42.3)      | 282 (36.4)      | 224 (39.6)      |

ELL = English Language Learner; SPED = special education; Rx = eyeglasses

Data presented as N (%) unless otherwise indicated.

Student race/ethnicity was not mutually exclusive, and students may have classified as more than one race/ethnicity. Percentages by student race/ethnicity may sum to more than 100%. Age was calculated as of the start of the study, on August 1, 2016.

**eTable 5.** Baseline Academic Test Outcome Equivalence

| <b>Outcome Period</b>             | <b>Subject</b> | <b>Test</b> | <b>Intervention Schools<br/>N</b> | <b>Control Schools<br/>N</b> | <b>Intervention Students<br/>n</b> | <b>Control Students<br/>n</b> | <b>Effect Size <sup>a</sup></b> |
|-----------------------------------|----------------|-------------|-----------------------------------|------------------------------|------------------------------------|-------------------------------|---------------------------------|
| <b>1-year Intervention Impact</b> |                |             |                                   |                              |                                    |                               |                                 |
| SY 16-17                          | Reading        | i-Ready     | 34                                | 73                           | 695                                | 824                           | -0.06                           |
|                                   |                | PARCC       | 41                                | 77                           | 781                                | 992                           | -0.12                           |
|                                   | Mathematics    | i-Ready     | 34                                | 72                           | 689                                | 827                           | -0.08                           |
|                                   |                | PARCC       | 41                                | 78                           | 788                                | 1004                          | -0.07                           |
| SY 17-18                          | Reading        | i-Ready     | 33                                | 32                           | 422                                | 332                           | +0.16                           |
|                                   |                | PARCC       | 41                                | 37                           | 591                                | 425                           | 0.00                            |
|                                   | Mathematics    | i-Ready     | 33                                | 33                           | 579                                | 460                           | +0.05                           |
|                                   |                | PARCC       | 41                                | 38                           | 750                                | 555                           | 0.00                            |
| <b>2-year Intervention Impact</b> |                |             |                                   |                              |                                    |                               |                                 |
| SY 17-18                          | Reading        | i-Ready     | 35                                | 32                           | 584                                | 332                           | 0.00                            |
|                                   |                | PARCC       | 41                                | 37                           | 709                                | 425                           | -0.12                           |
|                                   | Mathematics    | i-Ready     | 36                                | 33                           | 737                                | 460                           | +0.04                           |
|                                   |                | PARCC       | 41                                | 38                           | 862                                | 555                           | -0.05                           |

SY = school year; PARCC = Partnership for Assessment of Readiness for College and Careers.

<sup>a</sup> Effect size: the difference in score on a particular academic test between the intervention and control groups measured in standard deviation units.

Baseline achievement for the PARCC analyses included students' PARCC scores in the same subject in spring 2016, or i-Ready beginning-of-the-year scores in fall 2016 when students were missing prior PARCC

scores. A dummy variable was added to the model to indicate which pretest was used, as well as an interaction term between the dummy variable and students' beginning-of-the-year i-Ready score. Baseline achievement for the i-Ready analyses included students' i-Ready beginning-of-the-year scores in fall 2016 in the same subject.

**eFigure.** Comparison of Effect Size for V4B i-Ready Reading at 1 Year vs Common Educational Interventions

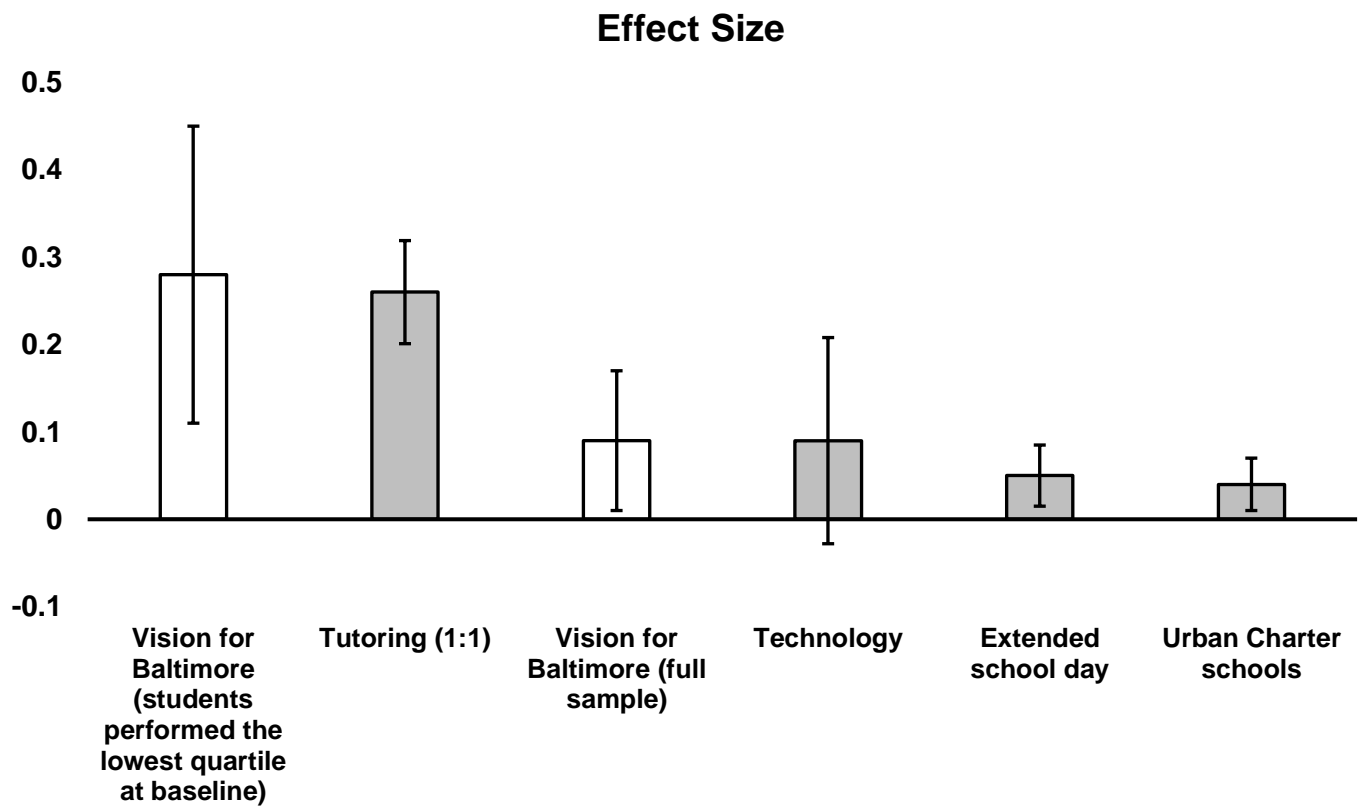

Effect size: the difference in score on a particular academic test between the intervention and control groups measured in standard deviation units.
