# Supplementary material
Source: PubMed Central journal article supplement (PMC8430909)
Supplement: jamaophthalmol-e213544-s003.pdf [file jamaophthalmol-e213544-s003.pdf]

## Data Sharing Statement

Neitzel. Effect of a Randomized Interventional School-Based Vision Program on Academic Performance of Students in Grades 3 to 7.

*JAMA Ophthalmol.* Published September 09, 2021.

doi:10.1001/jamaophthalmol.2021.3544

### Data

**Data available:** No
